# Supplementary material for: HrpA, an RNA Helicase Involved in RNA Processing, Is Required for Mouse Infectivity and Tick Transmission of the Lyme Disease Spirochete
Source: PubMed Central journal article supplement (PMC3868530; doi:10.1371/journal.ppat.1003841), 2013-12-19
Supplement: ppat.1003841.s004.pdf [file ppat.1003841.s004.pdf]

**Table S1. Plasmids used in this study.**

| <b><i>E. coli</i> strain<br/>(GCE) Number</b> | <b>Plasmid</b> | <b>Description</b>                  |
|-----------------------------------------------|----------------|-------------------------------------|
| 2800                                          | pASD1          | Wild-type <i>hrpA</i> in pET-15b    |
| 2804                                          | pASD5          | Wild-type <i>hrpA</i> in pJET       |
| 2806                                          | pASD7          | E127A- <i>hrpA</i> in pET-15b       |
| 2807                                          | pASD8          | D126A- <i>hrpA</i> in pET-15b       |
| 2813                                          | pASD14         | T160A- <i>hrpA</i> in pET-15b       |
| 2814                                          | pASD15         | I285A- <i>hrpA</i> in pET-15b       |
| 2819                                          | pASD20         | S158A- <i>hrpA</i> in pET-15b       |
| 2159                                          | pPOH62-1       | <i>hrpA</i> complementation plasmid |
| 3213                                          | pPOH86         | D126A- <i>hrpA</i> in pPOH62-1      |
| 3214                                          | pPOH87         | E127A- <i>hrpA</i> in pPOH62-1      |
| 3215                                          | pPOH88         | S158A- <i>hrpA</i> in pPOH62-1      |
| 3217                                          | pPOH90         | I285A- <i>hrpA</i> in pPOH62-1      |
