# Supplementary material for: HrpA, an RNA Helicase Involved in RNA Processing, Is Required for Mouse Infectivity and Tick Transmission of the Lyme Disease Spirochete
Source: PubMed Central journal article supplement (PMC3868530; doi:10.1371/journal.ppat.1003841), 2013-12-19
Supplement: ppat.1003841.s005.pdf [file ppat.1003841.s005.pdf]

**Table S2. Primers used in this study**

| Cloning <i>hrpA</i> in pJET1.2                           |                                                                                                       |                                                                                      |  |
|----------------------------------------------------------|-------------------------------------------------------------------------------------------------------|--------------------------------------------------------------------------------------|--|
| B1601-NdeI-catATGAATGATTTCAAACCTC <sup>1</sup>           |                                                                                                       |                                                                                      |  |
| B1603-BamHI-ggatccATAACAAGGCTTCAAAGTTAG <sup>1</sup>     |                                                                                                       |                                                                                      |  |
| Site Directed Mutations in <i>hrpA</i>                   |                                                                                                       |                                                                                      |  |
| Mutation Point                                           | Primers                                                                                               |                                                                                      |  |
| D126A                                                    | B1886-GAATATGATGTAATAATAATAGCCGAAGCACACGAAAGAAG<br>B1895-CTTCTTTTCGTGTGCTTCGGCTATTATTATTACATCATATTC   |                                                                                      |  |
| E127A                                                    | B1888-GATGTAATAATAATAGACGCAGCACACGAAAGAAGTTAAAC<br>B1889-GTTTAAACTTCTTTCGTGTGCTGCGTCTATTATTATTACATC   |                                                                                      |  |
| S158A                                                    | B2185-GATTTTAAAATCATAGTTTCGGCTGCTACAATAAACACAAAAA<br>B2186-TTTTTGTGTTTATTGTAGCAGCCGAAACTATGATTTTAAATC |                                                                                      |  |
| T160A                                                    | B2187-CATAGTTTCGTCTGCTGCAATAAACACAAAAATATT<br>B2188-AATATTTTTGTGTTTATTGCAGCAGACGAAACTATG              |                                                                                      |  |
| I285A                                                    | B2183-CAACATAGCAGAAACTTCAGCCACAATTGAAAATATTAAAT<br>B2184-ATTTTAATTTTCAATTGTGGCTGAAGTTTCTGCTATGTTG     |                                                                                      |  |
| Complementation plasmid construction                     |                                                                                                       |                                                                                      |  |
| Annealing site                                           | Primers <sup>2</sup>                                                                                  |                                                                                      |  |
| <i>hrpA</i>                                              | B1950-BamHI-cgcgatccgATGAATGATTTCAAACCTCCAAT <sup>1</sup>                                             |                                                                                      |  |
| <i>PflgB-kan</i> + <i>hrpA</i>                           | B1951-tctcctgaagctcggtatTAAAAAAGTAATTAATTTTTGTAA                                                      |                                                                                      |  |
| <i>hrpA</i> + <i>PflgB-kan</i>                           | B1952-TTACAAAAAATTAATTTACTTTTTTAAatcccgagctcaaggaaga                                                  |                                                                                      |  |
| between <i>hrpA</i> and <i>bb0826</i> + <i>PflgB-kan</i> | B1953-TCAAAGTTTACTTTTTTAAAAAAGTAttagaaaaactcatcgagcatc                                                |                                                                                      |  |
| <i>PflgB-kan</i> + between <i>hrpA</i> and <i>bb0826</i> | B1954-gatgctgatgagttttctaaTACTTTTTTAAAAACTAAACTTTGA                                                   |                                                                                      |  |
| <i>bb0826</i>                                            | B1955-EcoRI-ccggaattccggtTATTCTTTCTTTTTTATAAGA <sup>1</sup>                                           |                                                                                      |  |
| Screening <i>hrpA</i> mutants                            |                                                                                                       |                                                                                      |  |
|                                                          | Annealing site                                                                                        | Primers <sup>3</sup>                                                                 |  |
| Point mutations in <i>hrpA</i>                           | D126A                                                                                                 | B2176-CGTGTGCTTCGG                                                                   |  |
|                                                          | E127A                                                                                                 | B2173-TTCTTTCGTGTGCTG                                                                |  |
|                                                          | S158A                                                                                                 | B2201-GTTTATTGTAGCAGC                                                                |  |
| <i>hrpA</i> complementation                              | <i>hrpA</i>                                                                                           | B1219-GTTATTTTTGTATTCGGCTTT <sup>4</sup><br>B1220-TTCGGCTGCTACAATAAACAC <sup>4</sup> |  |
|                                                          | $\Delta$ <i>hrpA</i>                                                                                  | B1398-TTAAAACTTCAAAGATATTAACAA<br>B1399-GCAGGAAGACTTTCAAAA                           |  |
|                                                          | <i>PflgB-aacC1</i> (gent)                                                                             | B348-CGCAGCAGCAACGATGTTAC<br>B349-CTTGACGTAGATCACATAAGC                              |  |
|                                                          | <i>PflgB-kan</i>                                                                                      | B70-CATATGACCATATTCAACGGGAAACG<br>B71-AAAGCCGTTTCTGTAATGAAGGAG                       |  |
|                                                          |                                                                                                       |                                                                                      |  |
|                                                          |                                                                                                       |                                                                                      |  |
| Northern Blotting Probes                                 |                                                                                                       |                                                                                      |  |
| Target Transcript                                        | Primers                                                                                               |                                                                                      |  |
| <i>bb0241</i>                                            | B2205-GAATTATGCTTTGGAACAATAG<br>B2206-GGCACAAAAATAAACCACC                                             |                                                                                      |  |
|                                                          | B2221-GATTTTTTGAACTAAAAACAAC<br>B2222-GAATAGCACTATAGACCAATTG                                          |                                                                                      |  |
| <i>bb0242</i>                                            | B2223-GCTCTGTTCTATATTACGATGATTC<br>B2224-GTTTCTTGAGATTTTTGAAGTG                                       |                                                                                      |  |
|                                                          | B2225-CAAGAGAATGACAAAGACACTC<br>B2226-CCAAAGAGTCTTGTACTGTAGG                                          |                                                                                      |  |
| <i>bb0243</i>                                            | B2227-GTTTGCAGATTCTAACAATGC<br>B2228-CTTTGCAACATCTTTTTTTG                                             |                                                                                      |  |
|                                                          | B2227-GTTTGCAGATTCTAACAATGC<br>B2228-CTTTGCAACATCTTTTTTTG                                             |                                                                                      |  |
| <i>bb0603</i>                                            | B2225-CAAGAGAATGACAAAGACACTC<br>B2226-CCAAAGAGTCTTGTACTGTAGG                                          |                                                                                      |  |
|                                                          | B2227-GTTTGCAGATTCTAACAATGC<br>B2228-CTTTGCAACATCTTTTTTTG                                             |                                                                                      |  |
| <i>bb074</i>                                             | B2227-GTTTGCAGATTCTAACAATGC<br>B2228-CTTTGCAACATCTTTTTTTG                                             |                                                                                      |  |
|                                                          | B2227-GTTTGCAGATTCTAACAATGC<br>B2228-CTTTGCAACATCTTTTTTTG                                             |                                                                                      |  |

<sup>1</sup> Lower case letters indicate sequences added for the indicated restriction site.

<sup>2</sup> Upper and lower case letters indicate sequence from *B. burgdorferi* genome and *PflgB-kan* resistance cassette, respectively. Except where indicated <sup>1</sup>.

<sup>3</sup> Bold characters are the mutation points in the wild-type *hrpA* sequence.

<sup>4</sup> Primer used in Salman-Dilgimen *et al.* 2011
