# Supplementary material for: HrpA, an RNA Helicase Involved in RNA Processing, Is Required for Mouse Infectivity and Tick Transmission of the Lyme Disease Spirochete
Source: PubMed Central journal article supplement (PMC3868530; doi:10.1371/journal.ppat.1003841), 2013-12-19
Supplement: ppat.1003841.s006.pdf [file ppat.1003841.s006.pdf]

**Table S3. *B. burgdorferi* strains used in this study.**

| <b>Genotype</b>           | <b>Strain (GCB)</b> | <b>Reference</b>                   |
|---------------------------|---------------------|------------------------------------|
| <i>wt</i> (B31,clone 5A4) | 920                 | Purser and Norris 2000             |
| <b>knockout strains</b>   |                     |                                    |
| <i>hrpA</i>               | 1164                | Salman-Dilgimen <i>et al.</i> 2011 |
| <i>hrpA<sup>R+</sup></i>  | 548                 | This study                         |
|                           | 549                 |                                    |
| D126A                     | 572                 |                                    |
|                           | 573                 |                                    |
| E127A                     | 574                 |                                    |
|                           | 575                 |                                    |
| S158A                     | 576                 |                                    |
|                           | 577                 |                                    |
| I285A                     | 578                 |                                    |
|                           | 579                 |                                    |
