# Supplementary material for: HrpA, an RNA Helicase Involved in RNA Processing, Is Required for Mouse Infectivity and Tick Transmission of the Lyme Disease Spirochete
Source: PubMed Central journal article supplement (PMC3868530; doi:10.1371/journal.ppat.1003841), 2013-12-19
Supplement: ppat.1003841.s007.pdf [file ppat.1003841.s007.pdf]

**Table S4.** Partial list of *B. burgdorferi* genes regulated based upon microarray analysis

| <b>Gene Description</b>                                              | <b>FCAbsolute</b> | <b>p-value</b> | <b>Regulation</b> |
|----------------------------------------------------------------------|-------------------|----------------|-------------------|
| BB0242 Hypothetical protein                                          | 2.62              | 0.0624         | down              |
| BB0240 Glycerol uptake facilitator ( <i>glpF</i> )                   | 2.07              | 0.0471         | down              |
| BB0241 Glycerol kinase ( <i>glpK</i> )                               | 2.00              | 0.0750         | down              |
| BB0243 Glycerol-3-phosphate dehydrogenase, anaerobic ( <i>glpA</i> ) | 1.90              | 0.0471         | down              |
| BB0233 Ribosomal protein S20 ( <i>rpsT</i> )                         | 1.68              | 0.0693         | down              |
| BB0631 Hypothetical protein                                          | 1.59              | 0.1321         | down              |
| BB0482 Ribosomal protein S19 ( <i>rpsS</i> )                         | 1.59              | 0.0630         | up                |
| BBF26 Hypothetical protein                                           | 1.59              | 0.0622         | up                |
| BBF24 Hypothetical protein                                           | 1.57              | 0.0693         | up                |
| BBA49 Hypothetical protein                                           | 1.56              | 0.0471         | up                |
| BB0195 Cell division control protein 27, putative                    | 1.56              | 0.0471         | down              |
| BBF28 Hypothetical protein                                           | 1.55              | 0.0471         | up                |
| BBA39 Hypothetical protein                                           | 1.55              | 0.0471         | up                |
| BBF11 Hypothetical protein                                           | 1.55              | 0.0495         | up                |
| BB0603 Membrane-associated protein p66                               | 1.53              | 0.0503         | down              |
| BBA38 Hypothetical protein                                           | 1.53              | 0.0904         | up                |
| BB0424 Hypothetical protein                                          | 1.53              | 0.0415         | down              |
| BBA41 Hypothetical protein                                           | 1.53              | 0.1171         | up                |
| BB114 Hypothetical protein                                           | 1.53              | 0.0415         | down              |
| BBF30 Hypothetical protein                                           | 1.53              | 0.1240         | up                |
| BBA42 Hypothetical protein                                           | 1.52              | 0.0602         | up                |
| BB0799 Hypothetical protein                                          | 1.52              | 0.0471         | down              |
| BB0323 Hypothetical protein                                          | 1.52              | 0.0461         | down              |
| BB0189 50S ribosomal protein L35                                     | 1.51              | 0.0495         | down              |
| BBA43 Hypothetical protein                                           | 1.51              | 0.0396         | up                |
| BB0294 Flagellar basal-body rod protein ( <i>flgB</i> )              | 1.51              | 0.0483         | down              |
| BBF22 Protein p23, putative                                          | 1.51              | 0.0624         | up                |
| BB113 Hypothetical protein                                           | 1.51              | 0.0504         | down              |
| BB0238 Hypothetical protein                                          | 1.50              | 0.1384         | down              |
| BBL34 Hypothetical protein                                           | 1.50              | 0.0682         | up                |
| BB0188 50S ribosomal protein L20                                     | 1.50              | 0.0648         | down              |
| BBA35 Hypothetical protein                                           | 1.50              | 0.0781         | up                |
| BBA27 hypothetical protein                                           | 1.50              | 0.0801         | up                |
| BBA74 Outer membrane porin ( <i>oms28</i> )                          | 1.50              | 0.0693         | down              |
| BBA44 Hypothetical protein                                           | 1.50              | 0.0584         | up                |
| BBA57 Hypothetical protein                                           | 1.49              | 0.0744         | up                |
| BB0426 Hypothetical protein                                          | 1.49              | 0.0839         | down              |
| BBA32 Hypothetical protein                                           | 1.49              | 0.0584         | up                |
| BBA28 Hypothetical protein                                           | 1.49              | 0.0415         | up                |
| BBP380 ErpA                                                          | 1.49              | 0.1215         | up                |
| BBF27 Hypothetical protein                                           | 1.49              | 0.1046         | up                |
| BBA50 Hypothetical protein                                           | 1.49              | 0.0613         | up                |
| BB107 Hypothetical protein                                           | 1.49              | 0.0504         | down              |
| BBA33 Hypothetical protein                                           | 1.49              | 0.0317         | up                |
| BBA54 Hypothetical protein                                           | 1.48              | 0.1252         | up                |
| BBA45 Hypothetical protein                                           | 1.48              | 0.0630         | up                |
| BB0328 Oligopeptide ABC transporter ( <i>oppA-1</i> )                | 1.48              | 0.0596         | down              |
| BBA55 Hypothetical protein                                           | 1.48              | 0.1241         | up                |
| BBA37 Hypothetical protein                                           | 1.48              | 0.0504         | up                |
| BB104 Hypothetical protein                                           | 1.48              | 0.0657         | down              |

|                                                                |      |        |      |
|----------------------------------------------------------------|------|--------|------|
| <i>BB0190</i> Translation initiation factor 3 ( <i>infC</i> )  | 1.47 | 0.0478 | down |
| <i>BBA48</i> Hypothetical protein                              | 1.47 | 0.0415 | up   |
| <i>BBF23</i> Hypothetical protein                              | 1.47 | 0.0580 | up   |
| <i>BBF25</i> Hypothetical protein                              | 1.47 | 0.0964 | up   |
| <i>BBQ58</i> Hypothetical protein                              | 1.46 | 0.0396 | up   |
| <i>BBP40</i> Hypothetical protein                              | 1.46 | 0.0953 | up   |
| <i>BBA13</i> Hypothetical protein                              | 1.46 | 0.0657 | up   |
| <i>BBF13</i> Hypothetical protein                              | 1.46 | 0.0415 | up   |
| <i>BBA23</i> Hypothetical protein                              | 1.46 | 0.0495 | up   |
| <i>BBA29</i> Hypothetical protein                              | 1.45 | 0.0934 | up   |
| <i>BBP39</i> ErpB                                              | 1.45 | 0.0682 | up   |
| <i>BB0148</i> Hypothetical protein                             | 1.45 | 0.1471 | down |
| <i>BBA36</i> Lipoprotein                                       | 1.45 | 0.1416 | up   |
| <i>BBQ62</i> Hypothetical protein                              | 1.45 | 0.0569 | up   |
| <i>BBA56</i> Hypothetical protein                              | 1.45 | 0.0451 | up   |
| <i>BBA04</i> Antigen, S2                                       | 1.44 | 0.0938 | up   |
| <i>BBF01</i> ErpD protein, putative                            | 1.44 | 0.1237 | up   |
| <i>BBQ57</i> Hypothetical protein                              | 1.44 | 0.0560 | up   |
| <i>BBN41</i> Hypothetical protein                              | 1.44 | 0.0471 | up   |
| <i>BBA70</i> Hypothetical protein                              | 1.44 | 0.0982 | up   |
| <i>BBA11</i> Hypothetical protein                              | 1.43 | 0.0504 | up   |
| <i>BBA60</i> Surface lipoprotein P27                           | 1.43 | 0.0504 | up   |
| <i>BB0650</i> Hypothetical protein                             | 1.43 | 0.0471 | down |
| <i>BBL32</i> Plasmid partition protein, putative               | 1.43 | 0.0711 | up   |
| <i>BBA51</i> Hypothetical protein                              | 1.43 | 0.0780 | up   |
| <i>BB0559</i> Glucose-specific PTS system enzyme IIA component | 1.43 | 0.0630 | down |
| <i>BBL35</i> BdrO                                              | 1.43 | 0.0780 | up   |
| <i>BBA47</i> Hypothetical protein                              | 1.42 | 0.0577 | up   |
| <i>BBF03</i> Hypothetical protein                              | 1.42 | 0.0471 | up   |
| <i>BBA21</i> Hypothetical protein                              | 1.42 | 0.0577 | up   |
| <i>BBI11</i> Hypothetical protein                              | 1.42 | 0.0528 | down |
| <i>BBF14</i> Hypothetical protein                              | 1.42 | 0.0908 | up   |
| <i>BB0024</i> Hypothetical protein                             | 1.42 | 0.0648 | down |
| <i>BBA24</i> Decorin binding protein A ( <i>dbpA</i> )         | 1.42 | 0.0495 | up   |
| <i>BBA46</i> Hypothetical protein                              | 1.42 | 0.0951 | up   |
| <i>BBA58</i> Hypothetical protein                              | 1.42 | 0.0730 | up   |
| <i>BBP26</i> Hypothetical protein                              | 1.42 | 0.1067 | up   |
| <i>BBF17</i> Hypothetical protein                              | 1.42 | 0.1032 | up   |
| <i>BBF09</i> Hypothetical protein                              | 1.42 | 0.0463 | up   |
| <i>BBI23</i> Hypothetical protein                              | 1.41 | 0.0661 | down |
| <i>BBA10</i> Hypothetical protein                              | 1.41 | 0.0995 | up   |
| <i>BBI21</i> Hypothetical protein                              | 1.41 | 0.0471 | down |
| <i>BBA40</i> Hypothetical protein                              | 1.41 | 0.0415 | up   |
| <i>BB0800</i> Transcription elongation factor NusA             | 1.41 | 0.0452 | down |
| <i>BBK36</i> Hypothetical protein                              | 1.41 | 0.0517 | up   |
| <i>BBA69</i> Hypothetical protein                              | 1.41 | 0.0463 | up   |
| <i>BBI08</i> Hypothetical protein                              | 1.41 | 0.0920 | down |
| <i>BBA52</i> Outer membrane protein                            | 1.40 | 0.0681 | up   |
| <i>BBA53</i> Hypothetical protein                              | 1.40 | 0.0951 | up   |

FCAbsolute (Fold Change Absolute) is the fold change between average of normalized data of *hrpA* mutant and complemented mutant. Regulation is given as the direction of fold change.
